# Supplementary material for: Interleukin-4 induces CD11c+ microglia leading to amelioration of neuropathic pain in mice
Source: eLife. 2025 Aug 1;14:RP105087. doi: 10.7554/eLife.105087 (PMC12316456; doi:10.7554/eLife.105087)
Supplement: Figure 1—source data 1. [file elife-105087-fig1-data1.xlsx]

## Sheet: 1A
time after PNI	PBS cont							PBS ipsi							IL4_cont								IL4_ipsi
pre	2	1.52689	2	2	1.52689	1.52689	2	1.52689	1.52689	1.52689	1.52689	2	2	2	2	1.52689	1.54048	1.52689	1.52689	2	1.52689	2	2	1.52689	1.5351	2	1.52689	2	1.52689	2
day14	2	2	1.52689	1.52689	0.899098	2	2	0.517164	0.365529	0.20182	0.143103	0.709356	0.517164	0.295607	1.52689	2	1.27573	1.52689	2	2	2	1.52689	0.295607	0.517164	0.295607	0.41317	0.41317	0.365529	0.295607	0.51572
day17	1.23351	2	1.52689	2	1.26042	1.52689	1.52689	0.424082	0.424082	0.295607	0.295607	0.366938	0.295607	0.424082	1.52689	1.52689	1.52689	1.52689	2	1.52689	2	1.52689	0.899098	1.26042	1.23351	0.51572	1.0976	0.741713	2	1.72479
day21	1.54048	2	0.899098	1.5351	1.52689	1.26042	2	0.709356	0.424082	0.295607	0.366938	0.630791	0.302318	0.41317	1.52689	1.52689	1.52689	1.5351	2	2	1.26042	2	0.899098	1.27573	1.52689	1.54048	1.52689	0.955873	2	1.26042

## Sheet: 1D
	CD11c+ microglia	Total microglia
PBS_cont_1	479.919	2172.26
PBS_cont_2	383.228	2255.39
PBS_cont_3	319.21	1979.1
PBS_cont_4	476.342	1827.96
PBS_cont_5	680.084	2989.54
PBS_cont_6	423.301	2612.21
PBS_cont_7	704.63	3121.18
PBS_ipsi_1	1396.42	4000.24
PBS_ipsi_2	1343.84	3999.22
PBS_ipsi_3	1409.08	3887.55
PBS_ipsi_4	1226.72	2936.24
PBS_ipsi_5	1387.8	4040.54
PBS_ipsi_6	1196.24	4328.31
PBS_ipsi_7	1605.34	4345.24
IL4_cont_1	2432.31	3985.72
IL4_cont_2	1981.82	3121.74
IL4_cont_3	2381.63	3555.58
IL4_cont_4	1797.12	2726.88
IL4_cont_5	1639.87	3300.57
IL4_cont_6	797.954	1824.56
IL4_ipsi_1	3466.01	4813.56
IL4_ipsi_2	2012.59	3503.16
IL4_ipsi_3	2179.75	3167.98
IL4_ipsi_4	2257.04	3170.75
IL4_ipsi_5	2257.4	3827.55
IL4_ipsi_6	2214.59	3526.75
