# Supplementary material for: Interleukin-4 induces CD11c+ microglia leading to amelioration of neuropathic pain in mice
Source: eLife. 2025 Aug 1;14:RP105087. doi: 10.7554/eLife.105087 (PMC12316456; doi:10.7554/eLife.105087)
Supplement: Figure 2—source data 1. [file elife-105087-fig2-data1.xlsx]

## Sheet: 2A
time after PNI	PBS_PBS_cont							PBS_PBS_ipsi							IL4_PBS_cont							IL4_PBS_ipsi							IL4_DTX_cont						IL4_DTX_ipsi
pre	1.52689	1.52689	1.26042	1.52689	2	1.0976	1.5351	1.52689	1.26042	1.52689	1.26042	2	1.52689	1.52689	1.52689	1.5351	1.26042	1.23351	2	1.52689	0.899098	1.52689	1.54048	1.23351	1.26042	2	1.52689	0.899098	2	1.0976	1.26042	1.52689	2	1.52689	1.26042	1.52689	1.52689	1.54048	1.52689	1.52689
day14	0.917532	1.23351	1.0708	2	1.52689	1.52689	1.52689	0.302318	0.295607	0.295607	0.105857	0.20182	0.41317	0.295607	1.27573	1.52689	1.26042	1.52689	2	0.899098	1.27573	0.295607	0.23906	0.157253	0.424082	0.517164	0.302318	0.295607	1.5351	0.882789	1.52689	2	2	1.54048	0.295607	0.143103	0.295607	0.295607	0.295607	0.143103
+3days IL-4	1.26042	1.5351	1.52689	1.52689	1.52689	1.54048	1.52689	0.302318	0.41317	0.23906	0.115211	0.302318	0.41317	0.630791	1.52689	2	2	2	1.0976	1.52689	0.899098	1.5351	1.23351	0.561417	0.882789	1.52689	0.295607	1.54048	2	1.52689	1.27573	2	1.23351	1.54048	1.23351	1.27573	0.882789	0.917532	1.01563	0.882789
+1day post DT	1.52689	2	1.0976	1.0976	1.52689	1.52689	1.52689	0.295607	0.302318	0.302318	0.295607	0.143103	0.583311	0.295607	1.27573	1.52689	1.72479	2	1.26042	1.0976	1.26042	0.899098	0.917532	0.366938	0.899098	1.52689	0.41317	1.26042	1.52689	2	1.54048	1.52689	2	1.0976	0.20182	0.302318	0.295607	0.365529	0.41317	0.295607

## Sheet: 2B
PBS_PBS_cont_1	162.082
PBS_PBS_cont_2	234.76
PBS_PBS_cont_3	310.018
PBS_PBS_cont_4	198.238
PBS_PBS_cont_5	223.228
PBS_PBS_ipsi_1	761.885
PBS_PBS_ipsi_2	916.528
PBS_PBS_ipsi_3	1070.56
PBS_PBS_ipsi_4	856.439
PBS_PBS_ipsi_5	766.596
IL4_PBS_cont_1	1030.5
IL4_PBS_cont_2	1120.85
IL4_PBS_cont_3	640.534
IL4_PBS_cont_4	889.381
IL4_PBS_ipsi_1	1580.72
IL4_PBS_ipsi_2	1467.94
IL4_PBS_ipsi_3	2036.13
IL4_PBS_ipsi_4	1322.2
IL4_DTX_cont_1	339.467
IL4_DTX_cont_2	265.841
IL4_DTX_cont_3	349.599
IL4_DTX_cont_4	143.919
IL4_DTX_ipsi_1	515.041
IL4_DTX_ipsi_2	542.255
IL4_DTX_ipsi_3	376.996
IL4_DTX_ipsi_4	366.321
