# Supplementary material for: Interleukin-4 induces CD11c+ microglia leading to amelioration of neuropathic pain in mice
Source: eLife. 2025 Aug 1;14:RP105087. doi: 10.7554/eLife.105087 (PMC12316456; doi:10.7554/eLife.105087)
Supplement: Figure 3—source data 1. [file elife-105087-fig3-data1.xlsx]

## Sheet: 3
time after PNI	PBS_PBS_cont						PBS_PBS_ipsi						IL4_PBS_cont						IL4_PBS_ipsi						IL4_DTX_cont						IL4_DTX_ipsi
pre	1.52689	1.52689	2	1.52689	1.52689	1.54048	1.52689	2	2	1.52689	1.52689	1.52689	1.52689	1.52689	2	1.52689	1.52689	1.52689	1.54048	1.52689	1.52689	1.52689	1.52689	1.54048	1.0976	2	2	2	1.54048	1.52689	1.52689	0.899098	2	2	0.899098	1.5351
day14	1.27573	2	2	2	1.52689	1.54048	0.295607	0.302318	0.295607	0.295607	0.424082	0.105857	1.52689	1.52689	1.52689	1.52689	1.52689	2	0.51572	0.295607	0.295607	0.295607	0.41317	0.295607	1.52689	1.23351	1.52689	2	1.54048	1.52689	0.424082	0.51572	0.295607	0.295607	0.295607	0.295607
+3days IL-4	1.54048	1.5351	2	1.52689	1.54048	0.899098	0.365529	0.295607	0.295607	0.51572	0.295607	0.295607	0.899098	1.52689	2	1.26042	1.52689	1.52689	1.23351	0.899098	0.917532	1.54048	1.27573	0.51572	1.52689	1.54048	1.52689	1.54048	1.54048	1.26042	1.27573	0.899098	1.52689	0.882789	0.899098	0.709356
+1day post DT	1.52689	1.54048	1.52689	1.52689	1.52689	2	0.302318	0.295607	0.295607	0.424082	0.295607	0.20182	2	1.54048	1.5351	1.54048	1.52689	1.52689	1.23351	0.899098	1.0976	1.01563	1.52689	0.51572	1.54048	0.899098	0.899098	1.52689	1.54048	0.899098	0.295607	0.882789	0.517164	0.13647	0.295607	0.295607
