# Supplementary material for: Interleukin-4 induces CD11c+ microglia leading to amelioration of neuropathic pain in mice
Source: eLife. 2025 Aug 1;14:RP105087. doi: 10.7554/eLife.105087 (PMC12316456; doi:10.7554/eLife.105087)
Supplement: Figure 4—source data 1. [file elife-105087-fig4-data1.xlsx]

## Sheet: 4A
PBS_1	155.881
PBS_2	222.763
PBS_3	157.224
PBS_4	177.829
DTX_1	3.40128
DTX_2	4.6209
DTX_3	19.6025
DTX_4	16.7258
DTX_5	15.7397

## Sheet: 4B
PBS_1	50.3333
PBS_2	35.6667
PBS_3	51.6667
PBS_4	71.3333
PBS_5	46.3333
DTX_1	43.3333
DTX_2	33.6667
DTX_3	41
DTX_4	55.6667
DTX_5	36.6667

## Sheet: 4C
time after PNI	PBS_PBS_cont					PBS_PBS_ipsi					IL4_PBS_cont					IL4_PBS_ipsi
Pre	2	2	1.52689	1.54048	1.54048	2	1.52689	1.52689	1.52689	1.54048	1.52689	2	1.01563	0.899098	1.54048	2	2	1.54048	2	1.54048
day14	2	2	1.52689	1.52689	1.23351	0.295607	0.295607	0.143103	0.23906	0.143103	1.54048	1.52689	1.52689	0.899098	1.27573	0.295607	0.20182	0.295607	0.302831	0.295607
day17	1.52689	1.52689	1.26042	0.709356	1.52689	0.51572	1.52689	0.899098	0.899098	1.27573	1.26042	1.0976	1.52689	1.52689	1.27573	0.899098	1.0976	0.899098	1.54048	0.899098
day18	2	1.52689	1.52689	0.899098	1.0976	0.899098	0.899098	0.899098	0.899098	1.0708	1.52689	1.52689	1.54048	0.899098	1.54048	1.23351	1.27573	1.27573	0.899098	0.75024
