# Supplementary material for: Interleukin-4 induces CD11c+ microglia leading to amelioration of neuropathic pain in mice
Source: eLife. 2025 Aug 1;14:RP105087. doi: 10.7554/eLife.105087 (PMC12316456; doi:10.7554/eLife.105087)
Supplement: Figure 5—source data 1. [file elife-105087-fig5-data1.xlsx]

## Sheet: 5A
time after PNI	SNI_cont					SNI_ipsi					SpNT_cont					SpNT_ipsi
pre	0.899098	2	1.52689	2	1.52689	1.52689	2	2	1.52689	1.52689	1.52689	2	1.5351	1.52689	1.54048	1.26042	1.26042	1.52689	2	1.52689
1	1.52689	1.27573	2	2	1.52689	0.882789	1.23351	1.52689	0.424082	1.0976	1.54048	1.52689	2	1.52689	2	1.0976	0.741713	0.51572	0.955873	0.899098
3	1.52689	2	1.52689	2	1.52689	0.250199	0.424082	0.75024	0.365529	0.223346	2	2	2	1.23351	1.52689	0.539244	0.0931721	0.13647	0.517164	0.295607
5	1.52689	2	1.54048	1.52689	1.27573	0.157253	0.424082	0.517164	0.20182	0.295607	1.52689	1.54048	1.52689	1.54048	2	0.302831	0.143103	0.157253	0.302318	0.424082
7	1.52689	2	1.52689	1.52689	1.52689	0.295607	0.51572	0.295607	0.157253	0.295607	1.26042	2	1.52689	1.0976	2	0.517164	0.336932	0.0808059	0.105857	0.365529
10	1.5351	2	1.52689	0.906522	1.52689	0.250199	0.23906	0.517164	0.517164	0.295607	2	1.5351	2	2	1.26042	0.365529	0.0817442	0.295607	0.302318	0.517164
14	2	1.52689	0.899098	1.26042	1.23351	0.366938	0.517164	0.295607	0.295607	0.41317	1.52689	1.52689	1.52689	0.899098	1.52689	0.366938	0.661607	0.23906	0.23906	0.517164
21	1.52689	1.52689	1.26042	1.52689	1.0976	0.115211	0.295607	0.51572	0.143103	0.709356	2	1.26042	1.52689	1.23351	1.54048	1.23351	0.366938	0.517164	0.41317	1.5351
28	2	0.882789	0.709356	1.54048	2	0.365529	0.250199	0.709356	0.143103	0.295607	0.882789	1.52689	1.52689	0.899098	1.23351	1.5351	0.295607	1.27573	0.41317	0.709356
35	1.54048	1.52689	2	1.5351	2	0.302318	0.517164	0.75024	0.157253	0.23906	1.54048	2	1.52689	0.899098	1.23351	1.5351	1.52689	0.917532	0.75024	1.26042
42	1.26042	2	0.709356	1.52689	1.52689	0.295607	0.51572	0.75024	0.295607	0.295607	1.27573	1.52689	1.52689	0.899098	1.52689	2	1.52689	0.899098	0.630791	0.899098
49	1.52689	2	0.630791	1.52689	1.52689	0.517164	0.302318	0.709356	0.295607	0.41317	1.52689	2	1.52689	2	1.26042	2	1.52689	1.52689	1.5351	1.52689
56	1.26042	1.52689	0.709356	1.54048	1.52689	0.366938	0.51572	0.295607	0.295607	0.41317	0.899098	1.52689	1.52689	0.899098	1.52689	1.52689	1.54048	1.52689	0.882789	1.5351

## Sheet: 5C
	CD11c+ microglia	Total microglia
day14_SpNT_cont_1	296.805	2159.32
day14_SpNT_cont_2	458.352	2773.7
day14_SpNT_cont_3	433.881	2679.14
day35_SpNT_cont_1	310.532	2472.08
day35_SpNT_cont_2	328.961	3005.8
day35_SpNT_cont_3	335.629	2951.74
day56_SpNT_cont_1	391.807	3219.8
day56_SpNT_cont_2	229.587	2504.03
day56_SpNT_cont_3	341.381	2879.47
day56_SpNT_cont_4	359.306	3035.63
day14_SpNT_ipsi_1	1260.45	5747.19
day14_SpNT_ipsi_2	1754.39	6390.74
day14_SpNT_ipsi_3	1694.41	6586.06
day35_SpNT_ipsi_1	1339.21	4566.88
day35_SpNT_ipsi_2	1380.03	4800.8
day35_SpNT_ipsi_3	1532.61	4536.9
day56_SpNT_ipsi_1	1623.95	4612.01
day56_SpNT_ipsi_2	1358.51	4308.91
day56_SpNT_ipsi_3	1384.44	4718.97
day56_SpNT_ipsi_4	1592.91	4557.67
day14_SNI_cont_1	430.303	2757.38
day14_SNI_cont_2	453.883	2919.86
day14_SNI_cont_3	338.76	2754.26
day35_SNI_cont_1	391.237	3975.12
day35_SNI_cont_2	637.715	3332.82
day35_SNI_cont_3	491.351	3091.11
day35_SNI_cont_4	547.994	2746.2
day35_SNI_cont_5	375.131	2662.04
day56_SNI_cont_1	462.032	3041.08
day56_SNI_cont_2	433.237	2774.24
day56_SNI_cont_3	559.693	2794.92
day56_SNI_cont_4	459.216	2937.52
day14_SNI_ipsi_1	755.858	5422.76
day14_SNI_ipsi_2	896.228	6100.7
day14_SNI_ipsi_3	774.043	5772.15
day35_SNI_ipsi_1	831.3	5525.7
day35_SNI_ipsi_2	1093.04	4260.4
day35_SNI_ipsi_3	1025.3	5074.24
day35_SNI_ipsi_4	925.874	4119.52
day35_SNI_ipsi_5	1029.93	4280.25
day56_SNI_ipsi_1	965.114	3995.21
day56_SNI_ipsi_2	1033.64	4071.13
day56_SNI_ipsi_3	829.755	4493.12
day56_SNI_ipsi_4	1016.04	3699.07
