# Supplementary material for: Interleukin-4 induces CD11c+ microglia leading to amelioration of neuropathic pain in mice
Source: eLife. 2025 Aug 1;14:RP105087. doi: 10.7554/eLife.105087 (PMC12316456; doi:10.7554/eLife.105087)
Supplement: Figure 6—source data 1. [file elife-105087-fig6-data1.xlsx]

## Sheet: 6A
SpNT_cont_1	0
SpNT_cont_2	0
SpNT_cont_3	0
SpNT_cont_4	0
SpNT_ipsi_1	1.54059
SpNT_ipsi_2	1.0758
SpNT_ipsi_3	0.896521
SpNT_ipsi_4	0.487088
SNI_cont_1	0
SNI_cont_2	0
SNI_cont_3	0
SNI_cont_4	0
SNI_ipsi_1	0
SNI_ipsi_2	0.198771
SNI_ipsi_3	0
SNI_ipsi_4	0.221702

## Sheet: 6B
SpNT_cont_1	0.975473
SpNT_cont_2	0.920502
SpNT_cont_3	1.10402
SpNT_ipsi_1	1.44707
SpNT_ipsi_2	1.46502
SpNT_ipsi_3	1.66218
SNI_cont_1	1.33656
SNI_cont_2	1.01833
SNI_cont_3	1.09058
SNI_cont_4	0.630577
SNI_ipsi_1	0.76083
SNI_ipsi_2	1.11126
SNI_ipsi_3	1.05569
SNI_ipsi_4	1.25456

## Sheet: 6C
SpNT_1	0.751901
SpNT_2	1.01198
SpNT_3	1.27466
SpNT_4	1.04294
SpNT_5	0.858962
SpNT_6	1.05957
SNI_1	0.671649
SNI_2	0.657495
SNI_3	0.175103
SNI_4	0.559146
SNI_5	0.213898
