# Supplementary material for: Interleukin-4 induces CD11c+ microglia leading to amelioration of neuropathic pain in mice
Source: eLife. 2025 Aug 1;14:RP105087. doi: 10.7554/eLife.105087 (PMC12316456; doi:10.7554/eLife.105087)
Supplement: Figure 7—source data 1. [file elife-105087-fig7-data1.xlsx]

## Sheet: 7C
	CD11c+ microglia	Total microglia
PBS_cont_1	468.951	2420.02
PBS_cont_2	517.966	2538.6
PBS_cont_3	291.26	1587.07
PBS_cont_4	261.61	1780.23
PBS_cont_5	418.623	2125.32
PBS_cont_6	306.22	2044.93
PBS_cont_7	200.645	1590.48
PBS_ipsi_1	724.149	3399.82
PBS_ipsi_2	1325.28	4075.25
PBS_ipsi_3	1094.06	3401.21
PBS_ipsi_4	523.086	2865.08
PBS_ipsi_5	673.983	2864.43
PBS_ipsi_6	570.072	3306.42
PBS_ipsi_7	438.323	2629.94
IL4_cont_1	770.478	2583.37
IL4_cont_2	1060.91	2121.82
IL4_cont_3	643.384	2136.52
IL4_cont_4	665.989	1694.7
IL4_cont_5	1475.48	2524.26
IL4_cont_6	783.379	2049.18
IL4_cont_7	502.154	1994.13
IL4_ipsi_1	1264.34	2886.92
IL4_ipsi_2	2015.12	3678.77
IL4_ipsi_3	1337.6	2794.73
IL4_ipsi_4	1249.9	2568.16
IL4_ipsi_5	1704.73	2861.34
IL4_ipsi_6	1383.04	2650.41
IL4_ipsi_7	852.021	2651.29

## Sheet: 7D
time after PNI	PBS_cont						PBS_ipsi						IL4_cont								IL4_ipsi
pre	2	1.52689	2	2	1.52689	1.52689	1.52689	2	2	1.54048	0.741713	2	2	1.52689	1.54048	1.26042	1.52689	1.26042	2	1.26042	1.52689	2	1.52689	1.26042	1.52689	1.52689	2	2
day14	2	2	1.52689	2	1.26042	1.54048	0.295607	0.295607	0.424082	0.295607	0.295607	0.51572	1.52689	1.52689	1.52689	1.52689	2	1.52689	1.52689	1.52689	0.295607	0.366938	0.424082	0.295607	0.365529	0.295607	0.302318	0.302318
+3days IL-4	2	1.52689	1.52689	1.52689	1.52689	2	0.51572	0.295607	0.366938	0.295607	0.23906	0.517164	2	1.26042	2	1.26042	2	1.52689	2	1.52689	0.630791	0.899098	0.899098	0.517164	0.295607	0.741713	1.26042	1.52689
+7days post IL-4	2	2	1.52689	1.52689	2	2	0.302831	0.143103	0.143103	0.23906	0.295607	0.41317	2	1.52689	2	1.52689	2	1.52689	1.54048	1.52689	0.899098	1.27573	0.899098	0.295607	0.295607	0.366938	1.5351	1.52689
