# Supplementary material for: Interleukin-4 induces CD11c+ microglia leading to amelioration of neuropathic pain in mice
Source: eLife. 2025 Aug 1;14:RP105087. doi: 10.7554/eLife.105087 (PMC12316456; doi:10.7554/eLife.105087)
Supplement: Figure 8—source data 1. [file elife-105087-fig8-data1.xlsx]

## Sheet: 8A
IL4_PBS_cont_1	297.022
IL4_PBS_cont_2	471.557
IL4_PBS_cont_3	879.737
IL4_PBS_cont_4	229.2
IL4_PBS_cont_5	506.069
IL4_PBS_cont_6	191.774
IL4_PBS_ipsi_1	601.175
IL4_PBS_ipsi_2	764.53
IL4_PBS_ipsi_3	2068.57
IL4_PBS_ipsi_4	786.639
IL4_PBS_ipsi_5	1080.39
IL4_PBS_ipsi_6	639.82
IL4_DTX_cont_1	78.5311
IL4_DTX_cont_2	155.034
IL4_DTX_cont_3	76.9091
IL4_DTX_cont_4	133.862
IL4_DTX_cont_5	128.913
IL4_DTX_cont_6	104.983
IL4_DTX_ipsi_1	128.958
IL4_DTX_ipsi_2	169.101
IL4_DTX_ipsi_3	148.594
IL4_DTX_ipsi_4	119.48
IL4_DTX_ipsi_5	389.684
IL4_DTX_ipsi_6	223.437

## Sheet: 8B
time after PNI	IL4_PBS_cont						IL4_PBS_ipsi						IL4_DTX_cont						IL4_DTX_ipsi
pre	2	1.52689	0.955873	1.52689	0.899098	1.52689	1.52689	1.52689	1.54048	1.52689	1.54048	1.54048	1.52689	1.54048	2	2	1.52689	2	1.52689	1.52689	2	1.52689	2	2
day14	1.54048	1.52689	1.27573	1.52689	1.52689	0.899098	0.295607	0.295607	0.295607	0.157253	0.0808059	0.115211	1.12501	2	2	1.52689	1.52689	1.54048	0.295607	0.20182	0.105857	0.295607	0.20182	0.295607
+3days IL-4	1.52689	1.52689	1.52689	1.27573	2	1.5351	0.51572	1.26042	0.899098	0.899098	1.54048	0.630791	2	1.54048	2	1.52689	2	2	0.882789	0.917532	0.51572	0.899098	0.899098	1.52689
+post DTX depletion	1.26042	1.52689	1.52689	1.52689	1.52689	1.27573	0.51572	1.23351	1.23351	0.539244	0.882789	0.899098	1.52689	1.52689	1.52689	1.5351	1.52689	2	0.295607	0.295607	0.295607	0.295607	0.295607	0.41317

## Sheet: 8C
time after PNI	Corn oil_cont					Corn oil_ipsi					Tamoxifen_cont							Tamoxifen_ipsi
pre	2	2	2	2	1.52689	1.52689	2	2	2	1.52689	2	1.52689	2	2	2	2	1.26042	2	1.52689	1.26042	2	2	2	1.54048
d14	1.52689	2	2	1.5351	1.26042	0.115211	0.517164	0.365529	0.41317	0.41317	2	2	1.54048	2	2	1.52689	1.0976	0.295607	0.365529	0.295607	0.517164	0.143103	0.51572	0.23906
d17	2	2	1.5351	1.52689	1.52689	0.366938	0.583311	0.366938	0.75024	0.899098	2	1.52689	1.54048	2	2	2	1.0976	0.295607	0.295607	0.143103	0.517164	0.295607	0.365529	0.105857
d19	1.52689	2	2	2	1.52689	0.366938	2	0.709356	1.52689	0.75024	2	2	1.52689	2	2	2	0.62932	0.302318	0.20182	0.295607	0.424082	0.424082	0.302318	0.295607
d25	2	2	2	2	1.27573	0.41317	1.52689	1.52689	1.52689	0.899098	1.52689	2	2	2	2	2	0.882789	0.517164	0.365529	0.295607	0.41317	0.295607	0.424082	0.20182

## Sheet: Sheet1
					IL4投与で回復し、includeした割合
					1st	2nd	Total
	Fig2A	SpNT	3groups	Male	6/6	7/7	13/13
	Fig3	SpNT	3groups	Female	8/8	4/4	12/12
	Fig4C	SpNT	2groups	i.p.	10/12		10/12	0.833333
	Fig8B	SNI	2groups	Male	9/10	3/5	12/15	0.8
